# Supplementary material
Source: publisher site journal article supplement (https://www.spandidos-publications.com/4257/downloadSupplementary)
Supplement: Supplementary file 1 [file downloadSupplementary]

Table SV. Genes previously reported as being related to chronic pain.

| Gene         | Type of pain                                | Pain-related mechanism                                                                                  | References (PMID)    |
|--------------|---------------------------------------------|---------------------------------------------------------------------------------------------------------|----------------------|
| miR-320a-5p  | Bladder pain syndrome                       | Suppress inflammation by downregulating the expression of the nucleotide-binding oligomerization domain | 29531336<br>26752466 |
| miR-204-5p   | Spinal cord injury related neuropathic pain | Suppress the inflammatory response by targeting the interleukin 6 receptor                              | 29547407<br>30110560 |
| miR-146a-5p  | Knee osteoarthritis                         | Alleviate TNF- $\alpha$ - or LPS-induced mechanical allodynia                                           | 25957028<br>30105874 |
| Let-7 family | Chronic neuropathic pain                    | Regulation of $\mu$ -opioid receptor function                                                           | 22737161<br>22138088 |
